# Supplementary material for: Cell-type-specific Modulation of Non-homologous End Joining of Gamma Ray-induced DNA Double-strand Breaks by cAMP Signaling in Human Cancer Cells
Source: PubMed Central journal article supplement — J Korean Med Sci. 2020 Oct 14;35(48):e371. doi: 10.3346/jkms.2020.35.e371 (PMC7735920; doi:10.3346/jkms.2020.35.e371), 2020-10-14
Supplement: jkms-35-e371-s001.pdf [file jkms-35-e371-s001.pdf]

## Supplementary Fig. 1

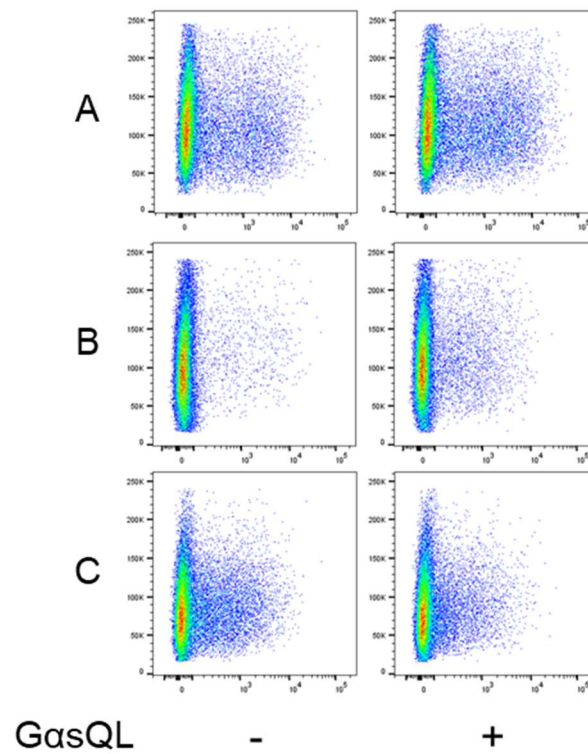

**Supplementary Fig. 1. Effects of GasQL on NHEJ repair of I-SceI endonuclease – induced DSBs.** The cells (A, SK-MEL-28 cells; B, HeLa cells; C, A549 cells) were cotransfected with GasQL and GFP fluorescent reporter plasmids linearized by I-SceI endonuclease using Lipofectamine 3000, and harvested after 24 h for flow cytometric analysis.
