# Supplementary material for: Cell-type-specific Modulation of Non-homologous End Joining of Gamma Ray-induced DNA Double-strand Breaks by cAMP Signaling in Human Cancer Cells
Source: PubMed Central journal article supplement — J Korean Med Sci. 2020 Oct 14;35(48):e371. doi: 10.3346/jkms.2020.35.e371 (PMC7735920; doi:10.3346/jkms.2020.35.e371), 2020-10-14
Supplement: jkms-35-e371-s003.pdf [file jkms-35-e371-s003.pdf]

### Supplementary Fig S3

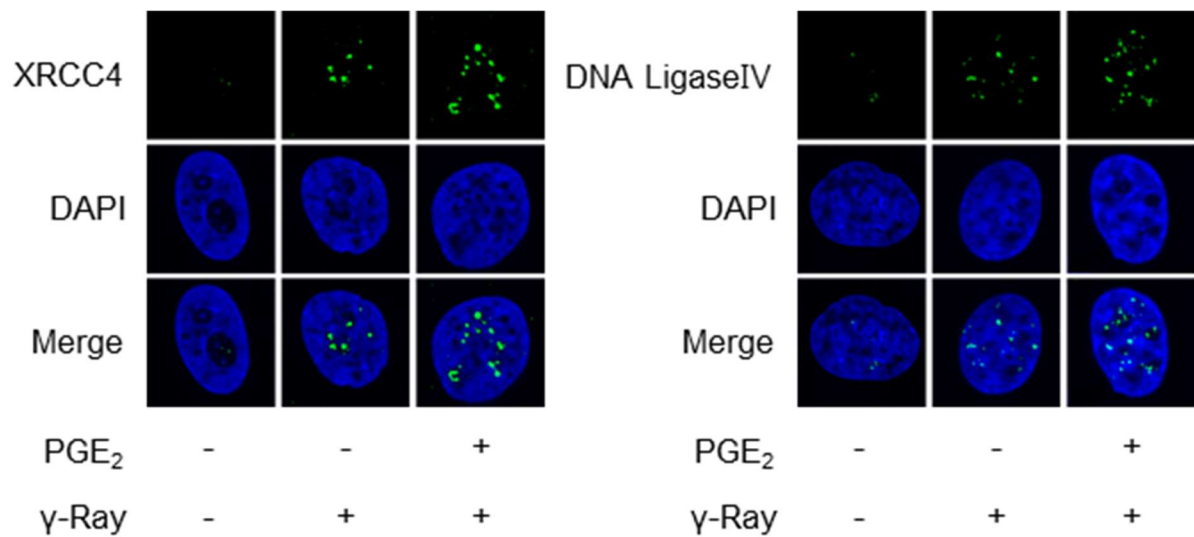

**Supplementary Fig. 3. Effects of PGE<sub>2</sub> on recruitment of XRCC4, DNA-Ligase IV following  $\gamma$ -ray irradiation in HeLa cells.** The cells were treated with 20  $\mu$ M PGE<sub>2</sub> for 30 min before irradiation with  $\gamma$ -rays (5 Gy) and incubated for 1 h. The irradiated cells were harvested and reacted with antibodies against XRCC4 or DNA-ligase IV, followed by DAPI staining. The stained cells were analyzed by confocal microscopy. Green color represents XRCC4 and DNA-Ligase IV, and blue color represents DAPI stained nucleus (100-fold amplification).
